# Supplementary figures and images for: Systematic review: genetic biomarkers associated with anti‐TNF treatment response in inflammatory bowel diseases
Source: PubMed Central journal article supplement — Aliment Pharmacol Ther. 2016 Jul 15;44(6):554–67. doi: 10.1111/apt.13736 (PMC5113857; doi:10.1111/apt.13736), 2016-07-15

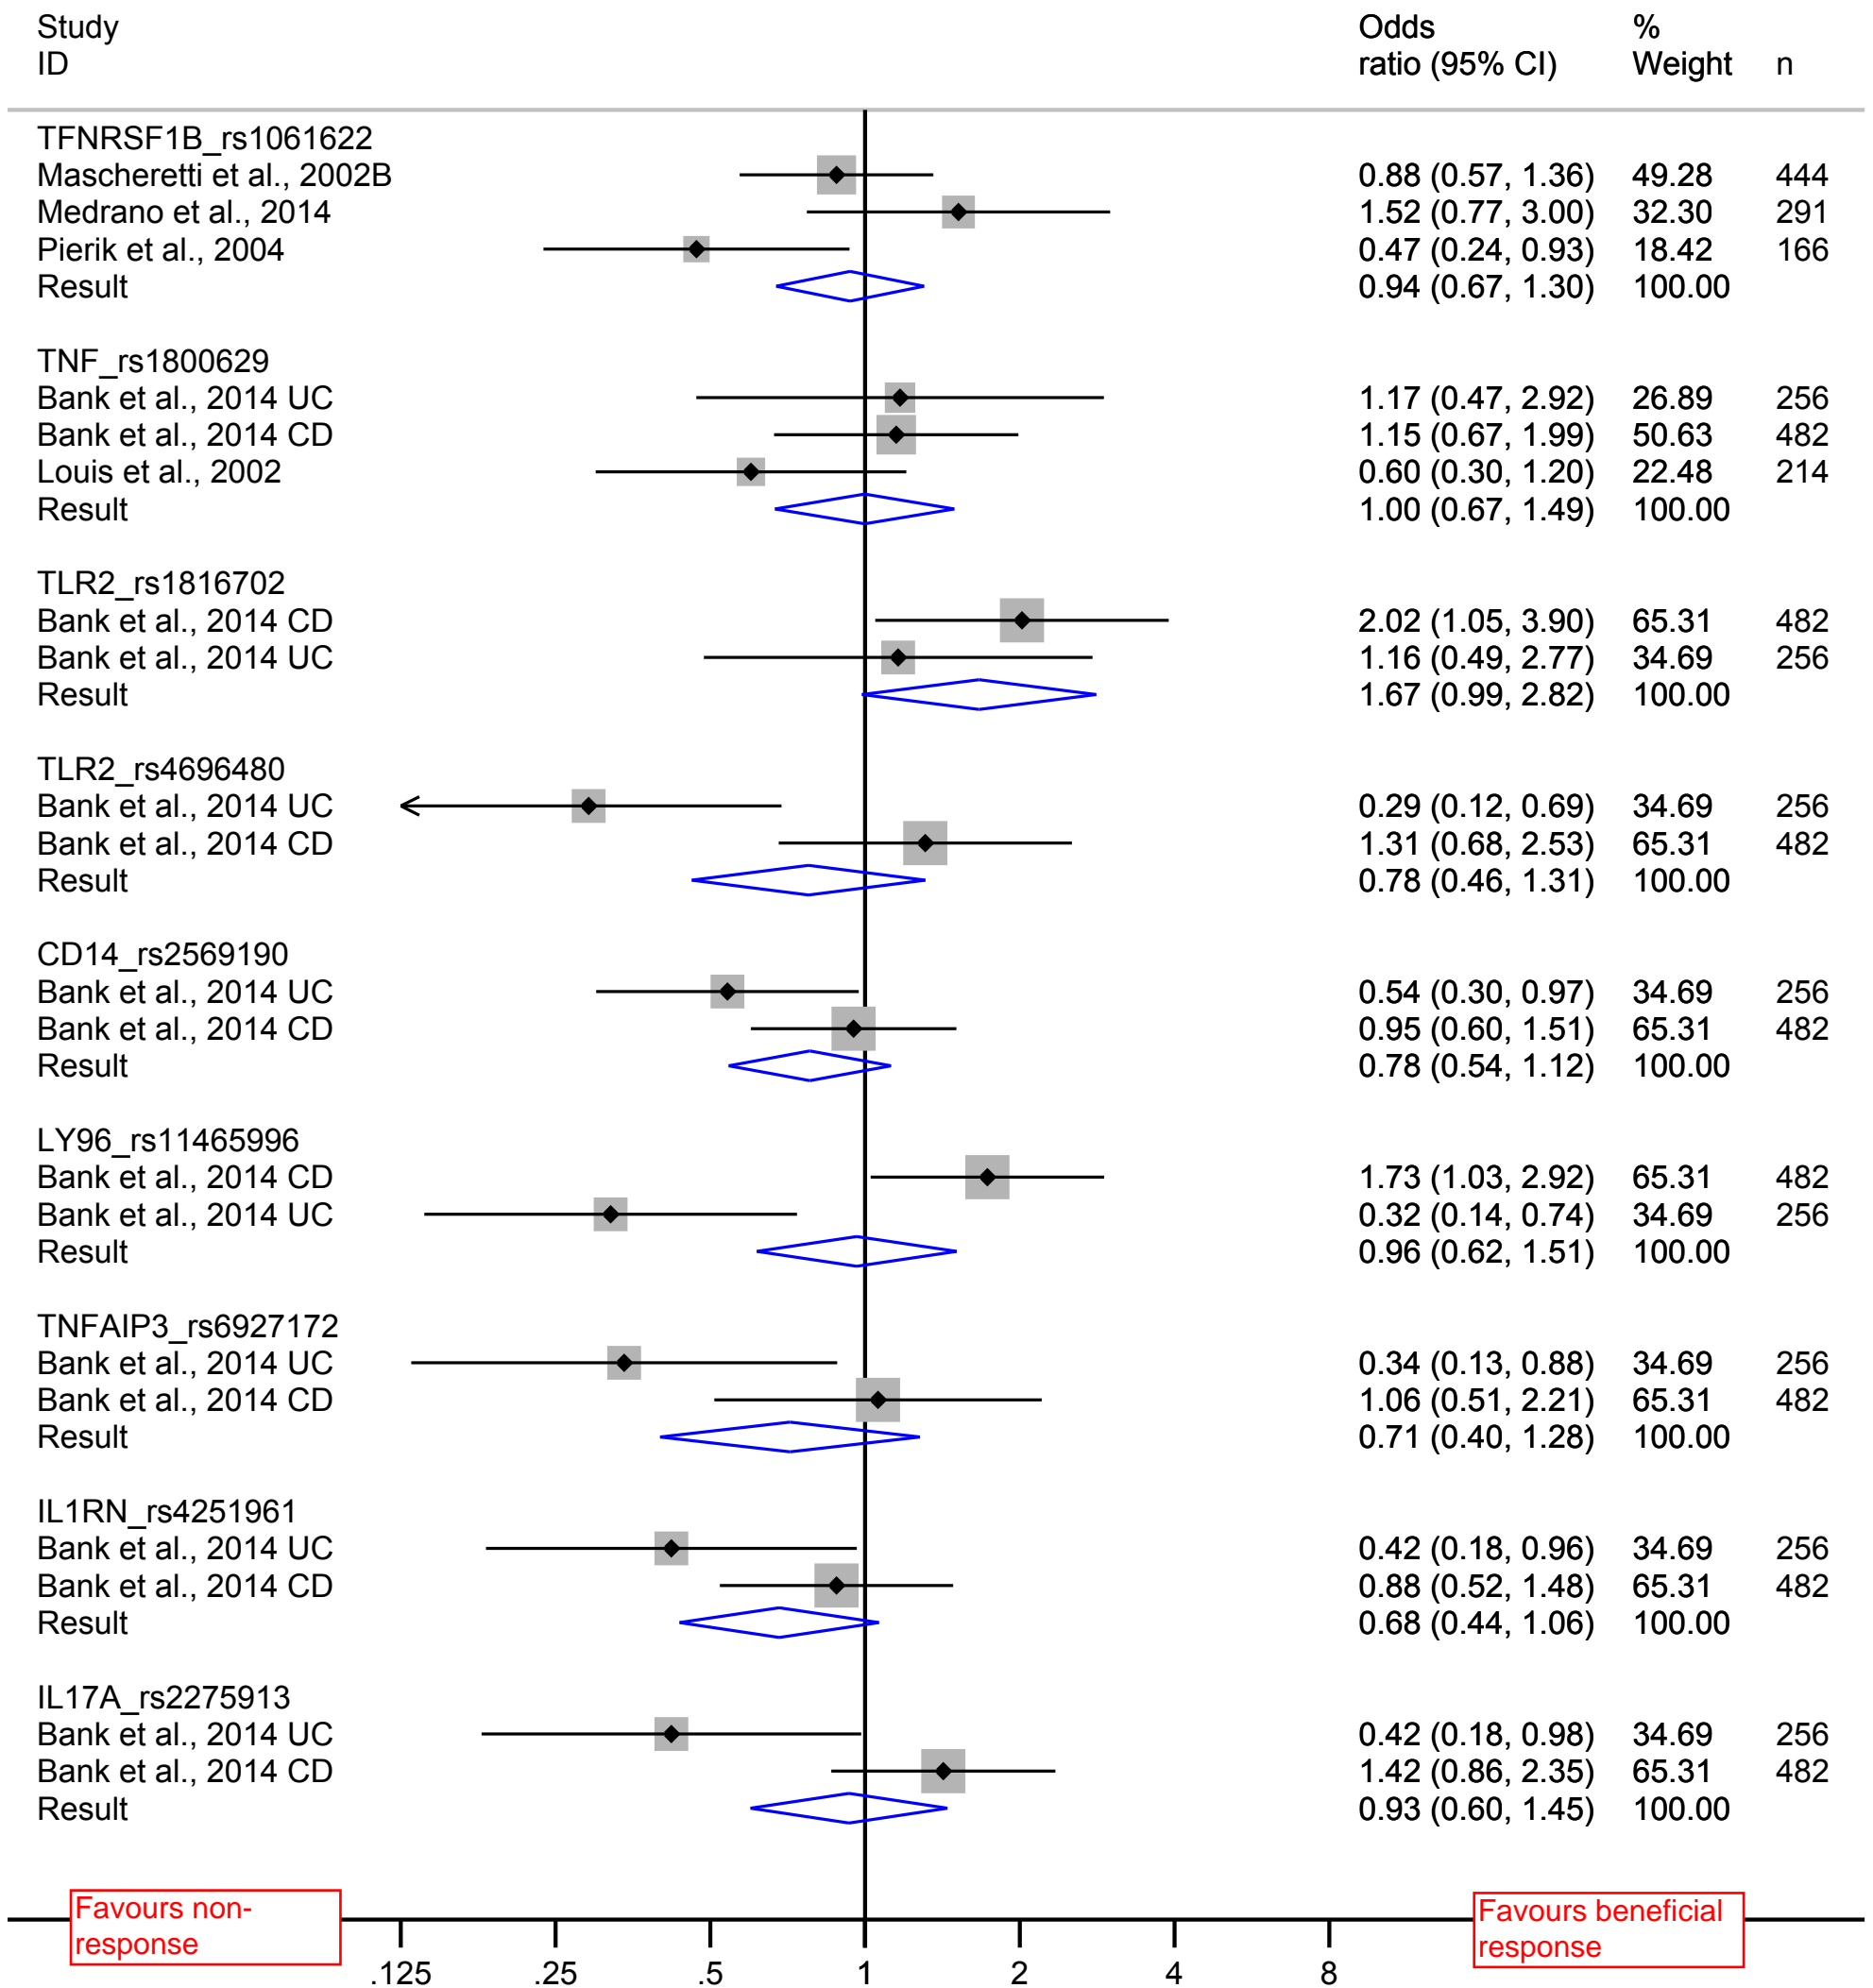

Supplement: APT-44-554-s002.pdf [file APT-44-554-s002.pdf]
